# Supplementary material for: Weed Pressure, Nutrient Content, and Seed Yield in Field Grown Sulfonylurea-Resistant Camelina sativa and Brassica napus
Source: MDPI journal article supplement (doi:10.3390/agronomy12112622), 2022-10-25
Supplement: s1 [file s1]

**Table S1.** Mean weed stem counts (no. m<sup>-2</sup>) and weed biomass dry weights (kg DM m<sup>-2</sup>) mid- and late-season from plots of sulfonylurea-resistant camelina and canola treated with (yes) or without (no) herbicide and mean crop by time interaction (C x T) at two locations (NDSU and NW22). Fallow was not treated with herbicide.

| Time      | Mid-season                        |      |       | Late-season |      |       | Mid-season                       |      |      | Late-season |      |      |
|-----------|-----------------------------------|------|-------|-------------|------|-------|----------------------------------|------|------|-------------|------|------|
| Herbicide | no                                | yes  | mean  | no          | yes  | mean  | no                               | yes  | mean | no          | yes  | mean |
| Weed      | stem count (no. m <sup>-2</sup> ) |      |       |             |      |       | biomass (kg DM m <sup>-2</sup> ) |      |      |             |      |      |
| NDSU      |                                   |      |       |             |      |       |                                  |      |      |             |      |      |
| Camelina  | 54.7                              | 31.0 | 42.8  | 56.5        | 25.2 | 40.9  | 0.08                             | 0.08 | 0.08 | 0.01        | 0.07 | 0.8  |
| Canola    | 9.7                               | 13.0 | 11.4  | 17.7        | 14.5 | 16.1  | 0.13                             | 0.08 | 0.10 | 0.07        | 0.06 | 0.06 |
| fallow    | 177.7                             | .    | 177.7 | 117.7       | .    | 117.7 | 0.13                             | .    | 0.13 | 0.46        | .    | 0.46 |
| LSD       | .                                 | .    | NS    | .           | .    | NS    | .                                | .    | 0.08 | .           | .    | 0.08 |
| NW22      |                                   |      |       |             |      |       |                                  |      |      |             |      |      |
| Camelina  | 35.5                              | 70.3 | 52.9  | 21.3        | 56.8 | 35.3  | 0.08                             | 0.11 | 0.09 | 0.10        | 0.15 | 0.12 |
| Canola    | 97.5                              | 54.8 | 76.1  | 62.5        | 63.0 | 62.8  | 0.10                             | 0.11 | 0.10 | 0.38        | 0.19 | 0.28 |
| Fallow    | 105.5                             | .    | 105.5 | 39.5        | .    | 39.5  | 0.32                             | .    | 0.32 | 0.94        | .    | 0.94 |
| LSD       | .                                 | .    | NS    | .           | .    | NS    | .                                | .    | NS   | .           | .    | NS   |

LSD (C×T) = Least significant difference (LSD,  $\alpha = 0.05$ ) for crop x time interaction. LSD value is to compare both between means of crop for a same season or for means between seasons for a same crop

NS = not significant.

**Table S2.** Mean crop stem counts (no. m<sup>-2</sup>) and biomass dry weights (kg DM m<sup>-2</sup>) mid- and late-season from field plots of sulfonylurea-resistant camelina or canola treated with (yes) or without (no) sulfonylurea and mean crop by time interaction (C x T) at two locations (NDSU and NW22).

| Time      | Mid-season                        |       |       | Late-season |       |       | Mid-season                       |      |      | Late-season |      |      |
|-----------|-----------------------------------|-------|-------|-------------|-------|-------|----------------------------------|------|------|-------------|------|------|
| Herbicide | no                                | yes   | mean  | no          | yes   | mean  | no                               | yes  | mean | no          | yes  | mean |
| Crop      | stem count (no. m <sup>-2</sup> ) |       |       |             |       |       | biomass (kg DM m <sup>-2</sup> ) |      |      |             |      |      |
| NDSU      |                                   |       |       |             |       |       |                                  |      |      |             |      |      |
| Camelina  | 215.5                             | 197.0 | 206.3 | 189.7       | 221.2 | 205.5 | 0.22                             | 0.19 | 0.21 | 0.44        | 0.42 | 0.43 |
| Canola    | 54.0                              | 34.7  | 44.4  | 44.5        | 56.5  | 50.5  | 0.26                             | 0.25 | 0.25 | 0.73        | 0.75 | 0.74 |
| LSD       | .                                 | .     | NS    | .           | .     | NS    | .                                | .    | 0.10 | .           | .    | 0.10 |
| NW22      |                                   |       |       |             |       |       |                                  |      |      |             |      |      |
| Camelina  | 313.5                             | 297.0 | 305.3 | 301.5       | 274.0 | 289.1 | 0.37                             | 0.41 | 0.39 | 0.75        | 0.81 | 0.77 |
| Canola    | 62.5                              | 71.5  | 67.0  | 88.5        | 88.5  | 88.5  | 0.35                             | 0.53 | 0.44 | 1.24        | 1.12 | 1.18 |
| LSD       | .                                 | .     | NS    | .           | .     | NS    | .                                | .    | 0.14 | .           | .    | 0.14 |

LSD = Least significant difference (LSD,  $\alpha = 0.05$ ) for crop x time interaction. LSD value is to compare both between means of crop for a same season or for means between seasons for a same crop.

NS = not significant.

**Table S3.** Final seasons mean seed yield (kg ha<sup>-1</sup>) from plots of sulfonylurea-resistant camelina or canola treated with (yes) or without (no) sulfonylurea herbicide and crop by herbicide interactions (C x H) at two locations (NDSU and NW22).

| Time      |                                   | Final harvest |        |
|-----------|-----------------------------------|---------------|--------|
| Herbicide | no                                | yes           | mean   |
| Crop      | Seed yield (kg ha <sup>-1</sup> ) |               |        |
|           | NDSU                              |               |        |
| Camelina  | 1246.5                            | 1172.1        | 1209.3 |
| Canola    | 1299.2                            | 1010.9        | 1155.0 |
| LSD       | .                                 | .             | NS     |
|           | NW22                              |               |        |
| Camelina  | 2214.7                            | 2412.5        | 2272.5 |
| Canola    | 1814.0                            | 1891.6        | 1852.5 |
| LSD       | .                                 | .             | NS     |

LSD = Least significant difference ( $\alpha = 0.05$ ) for crop x herbicide interaction.

NS = not significant.

**Table S4.** Mean nutrient content of sulfonylurea-resistant camelina or canola mid- and late-season and crop by time interaction (C x T) at two locations (NDSU and NW22) for nitrogen (N), phosphorus (P), potassium (K), sulfur (S).

| Time                | Mid-  | Late- | mean  | Mid- | Late- | mean | Mid-  | Late- | mean  | Mid- | Late- | mean |
|---------------------|-------|-------|-------|------|-------|------|-------|-------|-------|------|-------|------|
| Nutrient            | N     |       |       | P    |       |      | K     |       |       | S    |       |      |
| kg ha <sup>-1</sup> |       |       |       |      |       |      |       |       |       |      |       |      |
| NDSU                |       |       |       |      |       |      |       |       |       |      |       |      |
| Camelina            | 61.2  | 76.5  | 68.8  | 9.8  | 10.1  | 9.9  | 51.1  | 55.3  | 53.3  | 10.6 | 11.9  | 11.3 |
| Canola              | 69.0  | 128.3 | 98.6  | 13.7 | 18.4  | 16.1 | 82.1  | 133.5 | 10.8  | 11.2 | 25.4  | 18.3 |
| LSD                 | NS    | 29.3  | 20.7  | NS   | NS    | 2.9  | 29.6  | 29.6  | 20.9  | NS   | 5.3   | 3.8  |
| NW22                |       |       |       |      |       |      |       |       |       |      |       |      |
| Camelina            | 174.0 | 158.9 | 166.3 | 15.5 | 17.2  | 16.3 | 130.2 | 122.5 | 126.3 | 26.2 | 24.0  | 25.1 |
| Canola              | 175.1 | 225.4 | 200.2 | 12.7 | 20.7  | 16.7 | 183.6 | 194.4 | 189.0 | 26.0 | 45.8  | 35.9 |
| LSD                 | NS    | NS    | NS    | NS   | NS    | NS   | NS    | NS    | 32.1  | NS   | 6.5   | 4.7  |

LSD = Least significant difference ( $\alpha = 0.05$ ) for crop x time interaction.

NS = not significant.

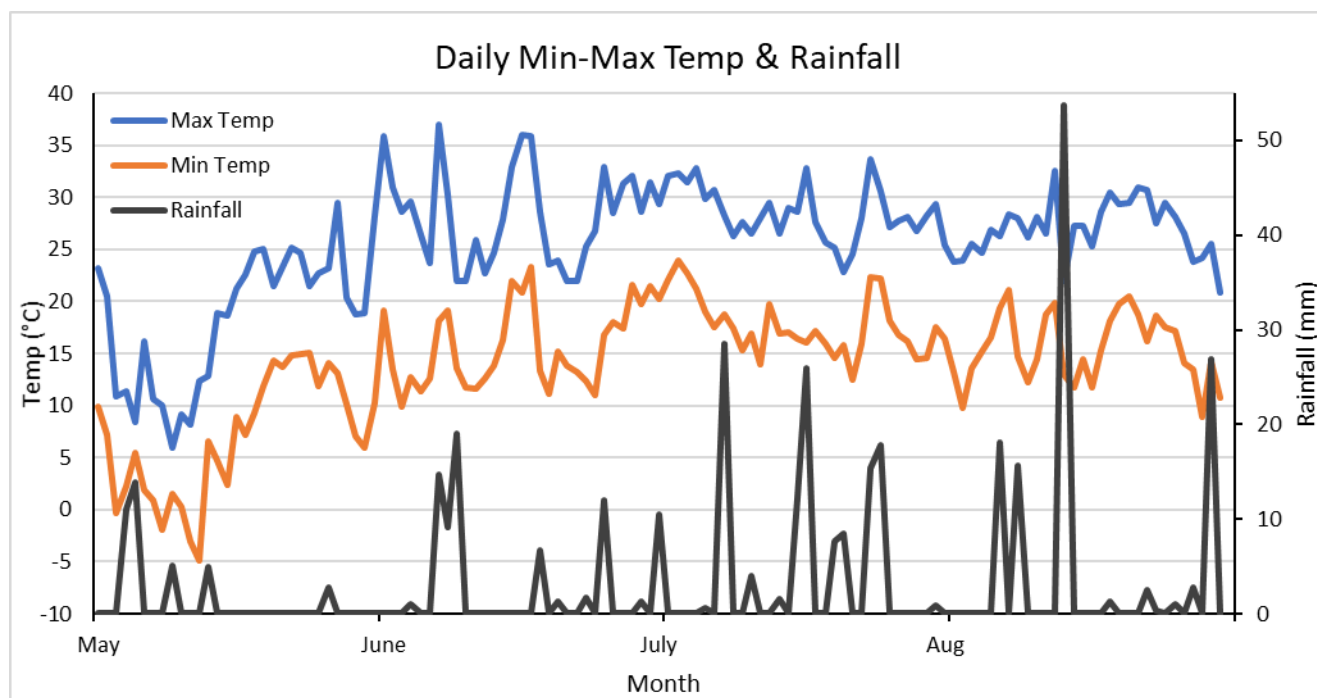

**Figure S1.** Daily minimum (Min) and maximum (Max) temperature (Temp °C) and precipitation (Rainfall (mm)) during the 2020 growing season (May – August) obtained from the North Dakota Agricultural Weather Network station located in Fargo, ND (<https://ndawn.ndsu.nodak.edu/station-info.html?station=23>, accessed 18 October 2022).

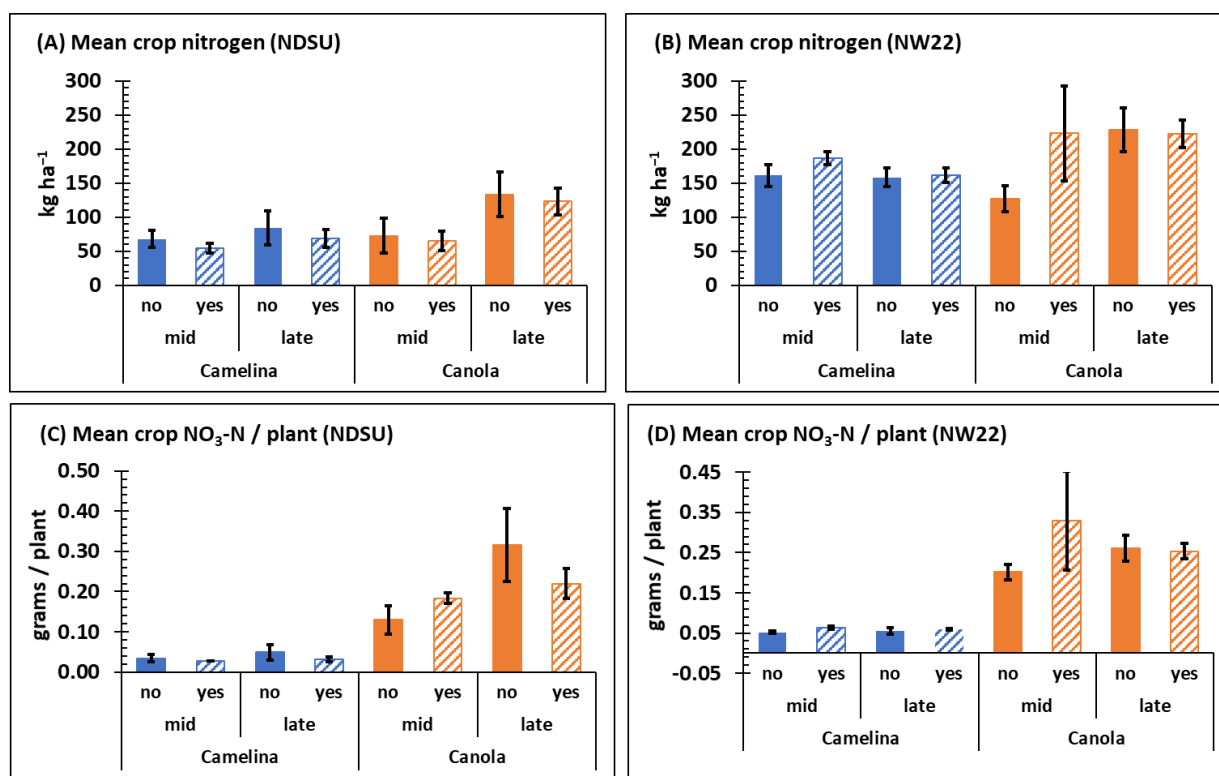

**Figure S2.** Nutrient content (NO<sub>3</sub>-N) of sulfonylurea-resistant camelina and canola mid- and late-season at NDSU and NW22 treated with (yes) or without (no) sulfonylurea; Kg ha<sup>-1</sup> (A and B) and grams / plant (C and D). Error bars represent the standard error of the mean.
