# Supplementary material for: Weed Pressure, Nutrient Content, and Seed Yield in Field Grown Sulfonylurea-Resistant Camelina sativa and Brassica napus
Source: MDPI journal article supplement (doi:10.3390/agronomy12112622), 2022-10-25
Supplement: s1 [file s1]

Archive with 1 entries (1 files):
- agronomy-1932225-supplementary.pdf
